# Supplementary material
Source: PubMed Central journal article supplement (PMC4522268)
Supplement: NIHMS523600-supplement-ESI.pdf [file NIHMS523600-supplement-ESI.pdf]

## **Supplemental Section**

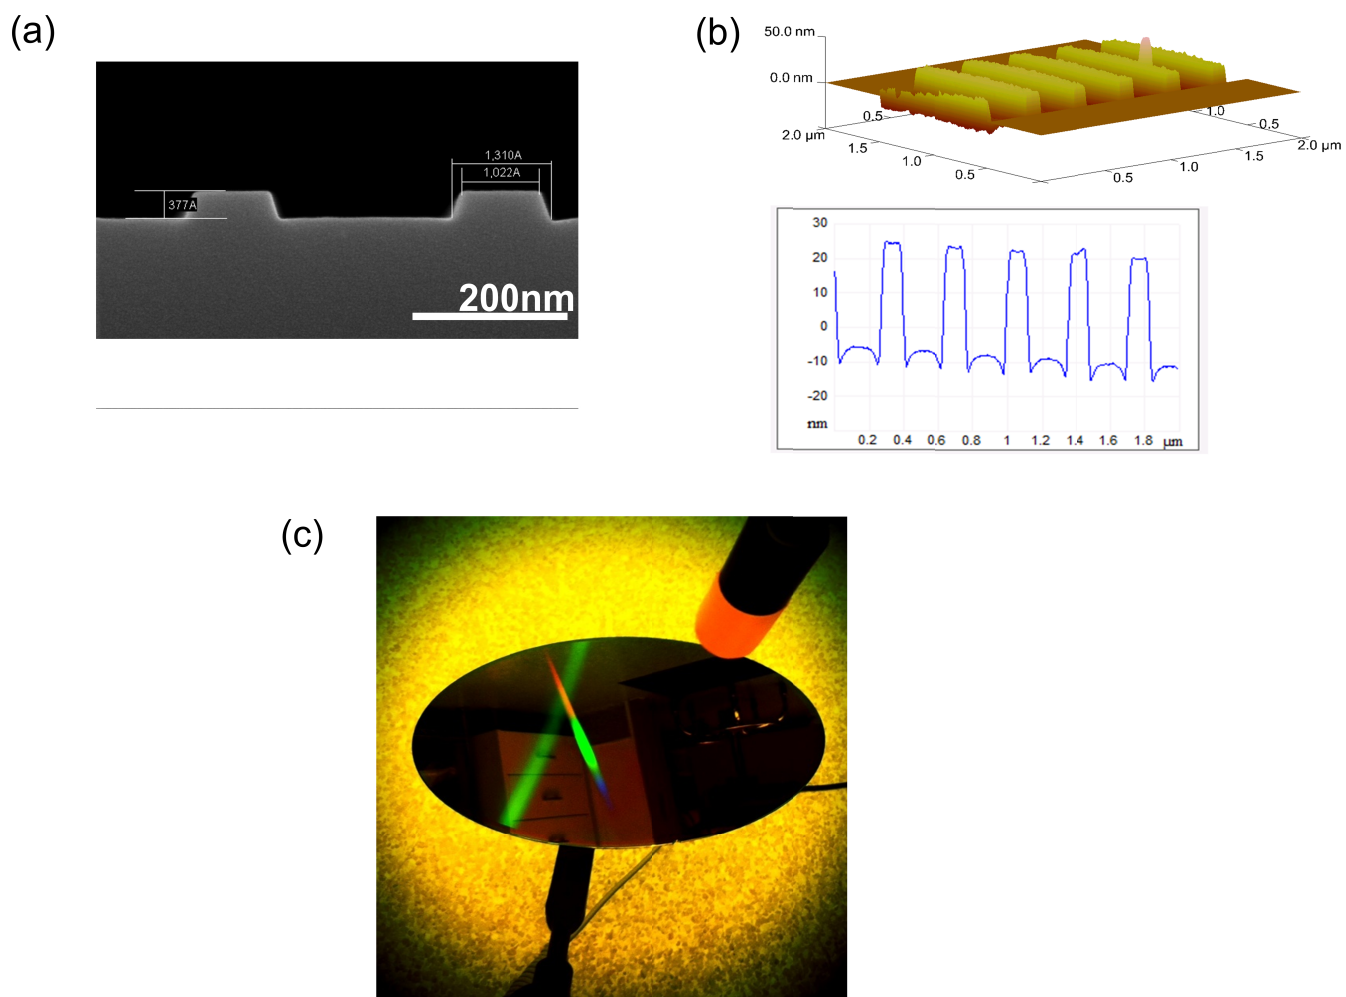

**Figure S1** (a) Cross-sectional SEM image of two periods of the PC grating in  $\text{SiO}_2$  and before the  $\text{TiO}_2$  coating. Measured grating depth of 37.7nm and grating line width of 131nm. (b) Atomic force micrograph of device after  $\text{TiO}_2$  coating with a measured period of  $352 \pm 7$ nm and grating depth of  $37 \pm 1.8$ nm. (c) PC grating patterned on an 8" wafer. Individual devices are diced to 1" x 0.5" pieces.

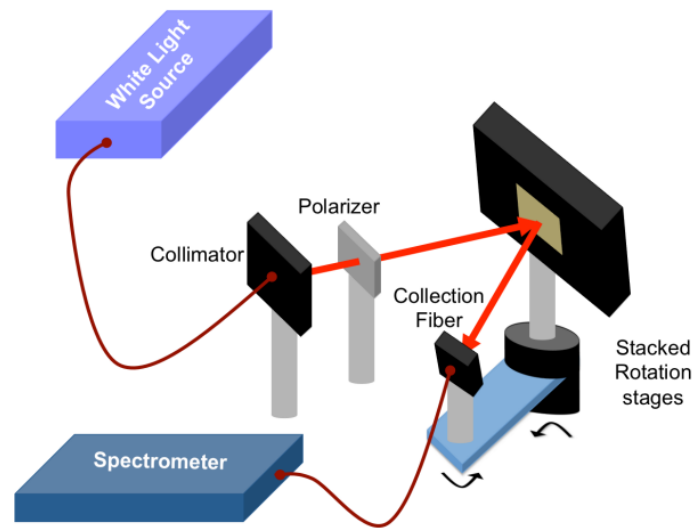

**Figure S2** (a) Schematic of the optical setup used to characterize the reflection efficiency of the Si PCs. Reflection and transmission efficiency measurements of a plastic-based, transparent PC (b) at normal incidence and (c) off-normal. In using this setup, good agreement was observed between the reflection and transmission profiles with slightly lower efficiencies in the reflection spectra.

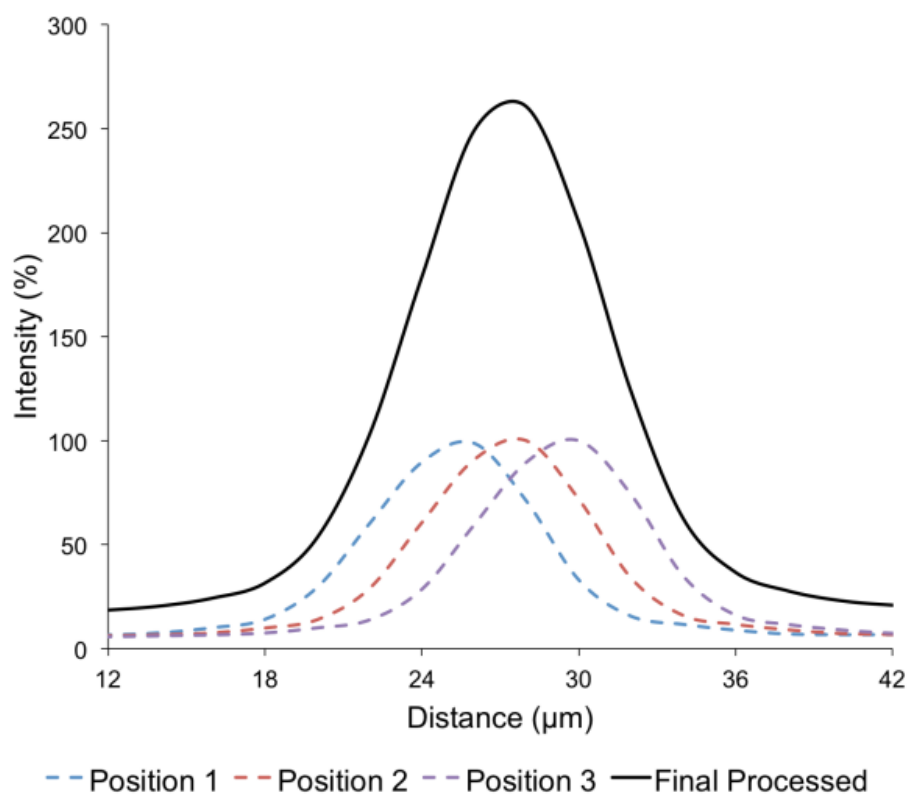

**Figure S3** A graph depicting the signal distribution in the focused direction of the illuminating line as it steps through three adjacent positions on the sample. The positions are 2  $\mu\text{m}$  apart. The black curve indicates the summation of all three curves at each pixel that is 2 $\mu\text{m}$  wide.
